# Supplementary material for: Flood Extent Delineation and Exposure Assessment in Senegal Using Google Earth Engine: The 2022 Event
Source: Preprints.org preprint supplement (doi:10.20944/preprints202404.1552.v1), 2024-04-25
Supplement: Supplementary file 1 [file supplementary]

|  | | **Flood extent by Google Earth Engine in km2 / month** | | | |
| --- | --- | --- | --- | --- | --- |
| **Region of Senegal** | **Number** | **July** | **August** | **September** | **October** |
| Dakar | 1 | 11,5 | 10,34 | 7,43 | 9,28 |
| Ziguinchor | 2 | 73,13 | 91,91 | 131,63 | 77,51 |
| Diourbel | 3 | 9,92 | 2,99 | 3,14 | 6,62 |
| Saint-Louis | 4 | 181,11 | 309,02 | 228,64 | 293,5 |
| Tambacounda | 5 | 43,23 | 59,21 | 56,93 | 36,38 |
| Kaolack | 6 | 39,96 | 18,31 | 33,09 | 21,68 |
| Thiès | 7 | 49,24 | 14,15 | 9,65 | 17,23 |
| Louga | 8 | 83,1 | 41,14 | 18,92 | 44,7 |
| Fatick | 9 | 74,7 | 69,1 | 90,67 | 48,56 |
| Kolda | 10 | 12,55 | 18,17 | 21,48 | 17,58 |
| Matam | 11 | 70,7 | 77,41 | 72,32 | 76,53 |
| Kaffrine | 12 | 3,59 | 1,04 | 0,89 | 1,7 |
| Kédougou | 13 | 57,75 | 56,22 | 61,03 | 35 |
| Sédhiou | 14 | 13,5 | 10,53 | 10,98 | 14,41 |
| **Total** |  | **723,98** | **779,54** | **746,8** | **700,68** |

SM2: Table listing flooded areas in km2 per month by regions obtained by Google Earth Engine
